# Supplementary material for: Hypervirulent Klebsiella pneumoniae as Unexpected Cause of Fatal Outbreak in Captive Marmosets, Brazil
Source: PubMed Central journal article supplement (PMC7706955; doi:10.3201/eid2612.191562), 2020-12
Supplement: 19-1562-Techapp-s1.pdf [file 19-1562-Techapp-s1.pdf]

# Hypervirulent *Klebsiella pneumoniae* as Unexpected Cause of Fatal Outbreak in Captive Marmosets, Brazil

## Appendix

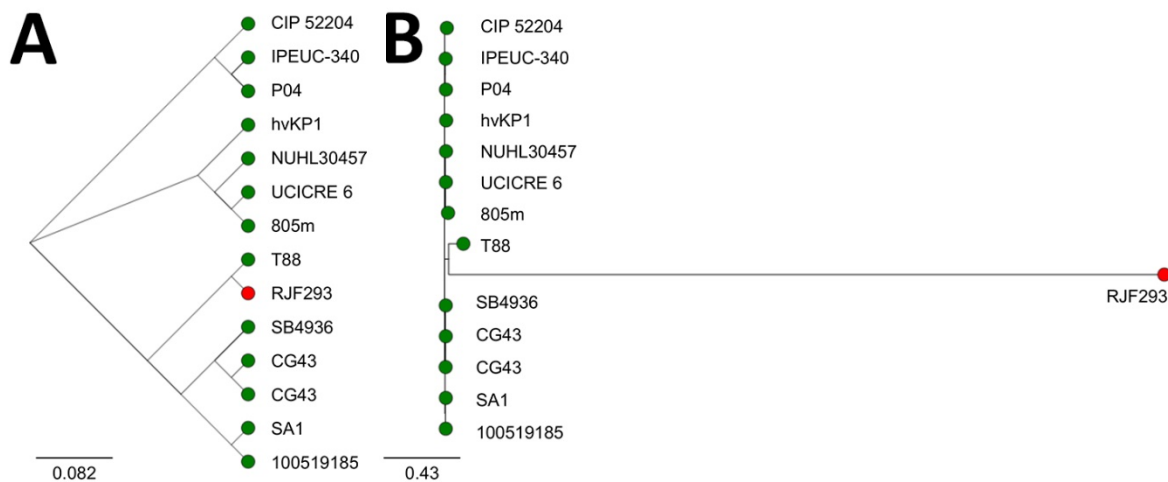

**Appendix Figure.** Schematic representations of high quality SNPs trees built from publicly available ST86 *K. pneumoniae* genomes. In A) it is possible to note that the P04 isolate described in this study clustered close to the IPEUC-340 isolate, recovered in 1975 in France. In B) we observe the high similarity of ST86 *K. pneumoniae* genomes in comparison with the outgroup strain RJJ293, an ST374 hypermucoviscous *K. pneumoniae* recovered from invasive infection. Green dots represent ST86 isolates; red dot represents ST374 isolate.
